# Supplementary material
Source: Elsevier journal article supplement (https://www.sciencedirect.com/science/article/pii/S1885585720304096)

## **Predictors of cardiovascular outcomes after surgery in severe tricuspid regurgitation: clinical, imaging and hemodynamic prospective study**

### **SUPPLEMENTARY DATA**

#### **CMR PROTOCOL**

All CMR studies were performed with a 1.5 T clinical scanner (Sonata or Avanto scanner Siemens, Erlangen, Germany) using a phased-array cardiac receiver coil. Electrocardiogram-gated breath-hold short-axis cine views were performed to quantify volumes and ejection fraction (SSFP sequences; slice thickness: 6 mm; space between slices 67%; matrix: 256x256; field of view: 300-370mm; temporal resolution < 50ms). Additional 2-chamber, 3-chamber and 4-chamber views were also obtained. LGE images were acquired at identical slice positions to the cine images after the administration of 0.2 mmol/kg of body weight Gadolinium-DTPA (Gd-DTPA) (Berlex, Montville, NJ, USA).

A segmented inversion-recovery (seg-IR) gradient-echo sequence was acquired starting at 10-15 min after contrast administration (Matrix 256 x 197, voxel size 2.0 x 1.6 x 6 mm, TE 4.91 ms, TR 700 ms, flip angle 30°; and the bandwidth 140 z/pixel) for late gadolinium enhancement (LGE) quantification.

#### **Image analysis**

Left ventricular (LV) and right ventricular (RV) end-diastolic volumes (EDV), end-systolic volumes (ESV), ejection fraction (EF) and LV mass were performed by manually tracing the epicardial and endocardial borders as previously described. Volume indices were calculated by dividing the EDV or ESV by body surface area.

Quantification of the infarcted/fibrotic myocardium was assessed by delineating the regions of LGE with  $\geq 5$  standard deviations ( $\pm$  SD) over remote signal intensity on each of the contrast enhanced CMR tomograms and summed, as previously described.

Right atrial (RA) diameters were measured from the RA posterior wall to the tricuspid annular plane (AP diameter) and from the septum to the lateral wall (LM diameter) in the four-chamber orientation. Right atrial area in the four-chamber orientation was planimetered by tracing the endocardial border at maximal atrial diastole with exclusion of the confluence of the vena cava and the RA appendage. RA volume was measured by manually drawing the endocardial borders using the stack of short axis cine images as previously described.

### **Tissue tracking CMR**

All strain parameters were quantified offline by an experienced observer blinded to patient data. These analyses were carried out retrospectively using currently available certified software (CMR42, Circle Cardiovascular Imaging Inc., Calgary, Alberta, Canada). Data were expressed on a per-patient basis. The global peak longitudinal strain (LS), circumferential strain (CS), and radial strain (RS) were calculated as the mean of the respective peak values in the 16 segments.

### **Statistical analysis**

The linearity assumption for the Cox models for the prediction of the composite endpoint and for the prediction of cardiovascular mortality, was graphically represented by Martingale residuals against values of iRVEDV (figure 1A of the supplementary data and figure 2A of the supplementary data). Based on this analysis, it is possible to conclude from the Martingale residuals distribution that there is only a small deviation from linearity at higher levels of the variable iRVEDV. As the representation does not improve with the log iRVEDV (figure 1B of the supplementary data and figure 2B of the supplementary data) the original values of iRVEDV were used in the final model.

**Table 1 of the supplementary data**

Baseline characteristics of the entire study group and patients with or without cardiovascular mortality

|                                            | All patients<br>(n = 43) | Cardiovascular<br>mortality<br>(n = 7) | Patients alive<br>(n = 36) | P    |
|--------------------------------------------|--------------------------|----------------------------------------|----------------------------|------|
|                                            | n (%)                    | n (%)                                  | n (%)                      |      |
| <b>Demographics</b>                        |                          |                                        |                            |      |
| Age (year)                                 | 66.9 ± 9.6               | 72 ± 5.1                               | 65.9 ± 9.9                 | .152 |
| Female                                     | 67%                      | 4 (57%)                                | 25 (69%)                   | .565 |
| Weight (Kg)                                | 70.6 ± 10.7              | 66.1 ± 12.1                            | 71.5 ± 10.4                | .181 |
| Height (cm)                                | 161.3 ± 9.2              | 159.6 ± 8.1                            | 161.6 ± 9.5                | .540 |
| BMI                                        | 27.3 ± 4.7               | 26 ± 4.4                               | 27.5 ± 4.7                 | .396 |
| <b>Medical history</b>                     |                          |                                        |                            |      |
| Hypertension                               | 23 (54%)                 | 5 (71%)                                | 18 (50%)                   | .300 |
| Dyslipidemia                               | 16 (37%)                 | 3 (43%)                                | 13 (36%)                   | .638 |
| Diabetes                                   | 7 (16%)                  | 3 (43%)                                | 4 (11%)                    | .071 |
| CAD                                        | 4 (9%)                   | 0 (0%)                                 | 4 (11%)                    |      |
| Atrial fibrillation                        | 37 (86%)                 | 6 (86%)                                | 31 (86%)                   | .904 |
| Previous cardiac surgery                   | 19 (44%)                 | 3 (43%)                                | 16 (44%)                   | .805 |
| Asthma/COPD                                | 5 (12%)                  | 0 (0%)                                 | 5 (14%)                    |      |
| <b>NYHA Classification</b>                 |                          |                                        |                            | .749 |
| I                                          | 1 (2.4%)                 | 0 (0%)                                 | 1 (2.9%)                   |      |
| II                                         | 13 (31.0%)               | 2 (28.6%)                              | 11 (31.4%)                 |      |
| III                                        | 27 (64.3%)               | 5 (71.4%)                              | 22 (62.9%)                 |      |
| IV                                         | 1 (2.4%)                 | 0 (0%)                                 | 1 (2.9%)                   |      |
|                                            |                          |                                        |                            |      |
| EuroSCORE II                               | 4.8 ± 3.5                | 6.06 ± 3.61                            | 4.55 ± 3.48                | .351 |
| Aortic cross-clamping<br>duration (minute) | 90.6 ± 30.6              | 102.8 ± 38.6                           | 88.6 ± 29.4                | .259 |
| Isolated tricuspid surgery                 | 12 (27.9%)               | 3 (43%)                                | 9 (25%)                    | .442 |
| Tricuspid annuloplasty                     | 43 (100%)                |                                        |                            |      |
| <b>Blood test</b>                          |                          |                                        |                            |      |
| Hemoglobin (g/dL)                          | 12.6 ± 1.7               | 12.1 ± 1.2                             | 12.8 ± 1.8                 | .369 |
| Hematocrit (%)                             | 39.0 ± 5.1               | 37.4 ± 3.6                             | 39.3 ± 5.3                 | .429 |
| Urea (mg/dL)                               | 59.9 ± 46.2              | 56 ± 30.0                              | 60.6 ± 49.1                | .783 |
| Creatinine (mg/dL)                         | 1.0 ± 0.6                | 1.0 ± 0.2                              | 1.0 ± 0.6                  | .963 |
| eGFR (ml/min/1.73m <sup>2</sup> )          | 73.6 ± 26.2              | 64.6 ± 9.4                             | 75.3 ± 28.1                | .343 |
| AST (UI/L)                                 | 31.2 ± 15.3              | 30.4 ± 23.8                            | 31.3 ± 13.5                | .847 |
| ALT (UI/L)                                 | 24.3 ± 14.1              | 22.9 ± 26.6                            | 24.6 ± 10.6                | .643 |
| ALP (UI/L)                                 | 111.1 ± 41.7             | 160.8 ± 47.8                           | 98.6 ± 30.4                | .014 |
| GGT (UI/L)                                 | 145.6 ± 159.5            | 275.5 ± 318.2                          | 113.1 ± 79.6               | .157 |
| Bilirubin (mg/dL)                          | 1.1 ± 0.5                | 1.1 ± 0.4                              | 1.1 ± 0.5                  | .767 |
| Protein (g/dL)                             | 7.3 ± 0.7                | 7.3 ± 0.8                              | 7.3 ± 0.6                  | .933 |
| Albumin (g/dL)                             | 3.9 ± 0.4                | 3.6 ± 0.2                              | 4.0 ± 0.4                  | .031 |
| Renin (ng/mL/h)                            | 8.5 ± 10.9               | 17.6                                   | 7.4 ± 11.1                 | .416 |
| Aldosterone (ng/dL)                        | 24.5 ± 17.2              | 50.2                                   | 22.0 ± 15.8                | NP   |

|                                              |                |               |               |      |
|----------------------------------------------|----------------|---------------|---------------|------|
| BNP (pg/mL)                                  | 321.1 ± 250.3) | 216.7 ± 22.7) | 347.3 ± 276.7 | .537 |
| <b>Right catheterization</b>                 |                |               |               |      |
| sPAP (mmHg)                                  | 41.5 ± 14.8    | 46 ± 29.0     | 40.7 ± 11.4   | .403 |
| mPAP (mmHg)                                  | 28.0 ± 8.6     | 29.8 ± 15.6   | 27.6 ± 7.2    | .537 |
| dPAP (mmHg)                                  | 19.4 ± 6.3     | 19.3 ± 10.1   | 19.5 ± 5.7    | .904 |
| iPVR (dyn*cm <sup>2</sup> /cm <sup>5</sup> ) | 371.3 ± 172.3  | 352.8 ± 169.5 | 375.0 ± 178.5 | .760 |
| RA pressure (mmHg)                           | 14 ± 6.67      | 18.33 ± 7.09  | 13.4 ± 6.6    | .305 |
| <b>Echocardiography</b>                      |                |               |               |      |
| LVEF (%)                                     | 57.2 ± 7.3     | 59.6 ± 9.6    | 56.8 ± 6.8    | .341 |
| TAPSE (mm)                                   | 17 ± 3.7       | 17.7 ± 3.3    | 16.9 ± 3.8    | .498 |
| S' Tricuspid annulus (cm/s)                  | 9.3 ± 2.5      | 10.7 ± 4.3    | 9.0 ± 1.8     | .053 |
| sPAP (mmHg)                                  | 53.5 ± 12.1    | 61.2 ± 8.8    | 52.2 ± 12.2   | .132 |
| Right atrium area (cm <sup>2</sup> )         | 35.7 ± 9.6     | 37 ± 14.1     | 35.5 ± 9.3    | .969 |
| Tricuspid annulus diameter (mm)              | 42.8 ± 7.5     | 43.6 ± 6.3    | 42.6 ± 7.8    | .767 |
| Inferior cava vein diameter (mm)             | 23.2 ± 5.3     | 26 ± 2.6      | 22.7 ± 5.5    | .181 |
| Massive tricuspid regurgitation              | 37 (86%)       | 6 (86%)       | 31 (86%)      | .993 |
| <b>Magnetic resonance</b>                    |                |               |               |      |
| iRVEDV (mL)                                  | 102.3 ± 36.2   | 126.9 ± 28.0  | 97.5 ± 36.0   | .069 |
| iRVESV (mL)                                  | 50.7 ± 18.8    | 62.7 ± 12.7   | 48.4 ± 19.0   | .087 |
| RVEF (%)                                     | 49.3 ± 8.2     | 49.6 ± 5.9    | 49.2 ± 8.6    | .926 |
| iLVEDV (mL)                                  | 79.1 ± 28.6    | 85.3 ± 39.1   | 77.8 ± 26.4   | .522 |
| iLVESV (mL)                                  | 38.4 ± 20.6    | 44.3 ± 32.3   | 37.2 ± 17.6   | .388 |
| LVEF (%)                                     | 57.2 ± 7.3     | 51.4 ± 10.5   | 53.2 ± 8.3    | .614 |
| Right atrium area (cm <sup>2</sup> )         | 35.7 ± 9.6     | 35.4 ± 9.5    | 36 ± 10.6     | .866 |
| Tricuspid annulus diameter (mm)              | 43.6 ± 7.3     | 41 ± 5.7      | 44.1 ± 7.5    | .289 |
| Longitudinal strain (%)                      | -17.2 ± 6.1    | -20.6 ± 4.8   | -16.5 ± 6.2   | .178 |
| Circumferential strain (%)                   | -14.9 ± 3.6    | -16.0 ± 2.5   | -14.7 ± 3.7   | .488 |
| Radial strain (%)                            | 24.7 ± 7.5     | 26.6 ± 5.6    | 24.4 ± 7.9    | .564 |
| Right atrium volume (mL)                     | 215.9 ± 112.8  | 207.7 ± 131.1 | 217.0 ± 113.5 | .805 |
| Right atrium diameter AP (mm)                | 87.6 ± 87.9    | 73.1 ± 13.2   | 90.4 ± 95.8   | .743 |
| Right atrium diameter LM (mm)                | 59.7 ± 14.7    | 63 ± 13.0     | 59 ± 15.1     | .595 |
| <b>Treatment at discharge</b>                |                |               |               |      |
| Betablocker                                  | 9 (23.7%)      | 0 (0%)        | 9 (25.7%)     | 1    |
| ACEi/ARB                                     | 19 (50%)       | 1 (33.3%)     | 18 (51.4%)    | .578 |
| MRA                                          | 16 (42.1%)     | 3 (100%)      | 13 (37.1%)    | 1    |
| Furosemide                                   | 35 (92.1%)     | 3 (100%)      | 32 (91.4%)    | .597 |
| Furosemide dosage                            | 65.1 ± 44.3    | 133.3 ± 100.7 | 58.8 ± 31.7   | .04  |

Values are mean ± standard deviation or n (%).

BMI, body mass index; CAD, coronary artery disease; COPD, chronic obstructive pulmonary disease;

eGFR, glomerular filtration rate; AST, aspartate aminotransferase ; ALT, alanine aminotransferase; ALP,

alkaline phosphatase; GGT, gamma-glutamyltransferase; BNP, brain natriuretic peptide; sPAP, systolic pulmonary artery pressure; mPAP, mean pulmonary artery pressure; dPAP, diastolic pulmonary artery pressure; iPVR, indexed pulmonary vascular resistance; LVEF, left ventricular ejection fraction; iRVEDV, indexed right ventricular end-diastolic volume; iRVESV, indexed right ventricular end-systolic volume; RVEF, right ventricular ejection fraction; iLVEDV, indexed left ventricular end-diastolic volume; iLVESV, indexed left ventricular end-systolic volume; AP, anteroposterior; LM, lateral-medial.

**Table 2 of the supplementary data**

Baseline characteristics of the entire study group and patients with or without recurrence of significant tricuspid regurgitation

|                                         | All patients<br>(n = 40) | Significant<br>tricuspid<br>regurgitation<br>(n = 13) | No significant<br>tricuspid<br>regurgitation<br>(n = 27) | P     |
|-----------------------------------------|--------------------------|-------------------------------------------------------|----------------------------------------------------------|-------|
|                                         | n (%)                    | n (%)                                                 | n (%)                                                    |       |
| <b>Demographics</b>                     |                          |                                                       |                                                          |       |
| Age (year)                              | 66.8 ± 9.8               | 69.8 ± 1.9                                            | 65.3 ± 2.1                                               | .174  |
| Female                                  | 27 (67.5)                | 9 (69.2)                                              | 18 (66.7)                                                | 1     |
| Weight (Kg)                             | 70.8 ± 11.0              | 71.5 ± 9.7                                            | 70.4 ± 11.8                                              | .781  |
| Height (cm)                             | 161.5 ± 9.4              | 160.9 ± 2.8                                           | 161.7 ± 9.3                                              | .801  |
| BMI                                     | 27.3 ± 4.8               | 27.7 ± 3.5                                            | 27.1 ± 5.3                                               | .728  |
| <b>Medical history</b>                  |                          |                                                       |                                                          |       |
| Hypertension                            | 21 (52.5)                | 9 (69.2)                                              | 12 (44.4)                                                | .186  |
| Dyslipidemia                            | 14 (35.0)                | 7 (53.9)                                              | 7 (25.9)                                                 | .155  |
| Diabetes                                | 6 (15.0)                 | 4 (30.8)                                              | 2 (7.4)                                                  | .075  |
| CAD                                     | 4 (10.0)                 | 2 (15.4)                                              | 2 (7.4)                                                  | .584  |
| Atrial fibrillation                     | 35 (87.5)                | 12 (92.3)                                             | 23 (85.2)                                                | 1.000 |
| Previous cardiac surgery                | 18 (45.0)                | 5 (38.5)                                              | 13 (48.2)                                                | .737  |
| Asthma/COPD                             | 5 (12.5)                 | 2 (15.4)                                              | 3 (11.1)                                                 | 1.000 |
| <b>NYHA Classification</b>              |                          |                                                       |                                                          | .770  |
| I                                       | 1 (2.6%)                 | 0 (0%)                                                | 1 (3.9%)                                                 |       |
| II                                      | 12 (30.8%)               | 3 (23.1%)                                             | 9 (34.6%)                                                |       |
| III                                     | 10 (64.1%)               | 10 (76.9%)                                            | 15 (57.7%)                                               |       |
| IV                                      | 1 (2.6%)                 | 0 (0%)                                                | 1 (3.9%)                                                 |       |
|                                         |                          |                                                       |                                                          |       |
| Euroscore II                            | 5.0 ± 3.6                | 5.6 ± 3.9                                             | 4.6 ± 3.5                                                | .435  |
| Aortic cross-clamping duration (minute) | 90.6 ± 31.1              | 80.9 ± 40.6                                           | 94.1 ± 27.0                                              | .281  |
| Isolated tricuspid surgery              | 11 (27.5)                | 6 (46.2)                                              | 5 (18.5)                                                 | .067  |
| Tricuspid annuloplasty                  | 43 (100%)                |                                                       |                                                          |       |
| <b>Blood test</b>                       |                          |                                                       |                                                          |       |
| Hemoglobin (g/dL)                       | 12.6 ± 1.7               | 12.2 ± 1.3                                            | 12.8 ± 1.9                                               | .322  |
| Hematocrit (%)                          | 38.9 ± 5.2               | 38.2 ± 4.0                                            | 39.29 ± 5.7                                              | .526  |
| Urea (mg/dL)                            | 61.6 ± 47.4              | 75.1 ± 62.7                                           | 55.1 ± 37.8                                              | .216  |
| Creatinine (mg/dL)                      | 1.0 ± 0.6                | 1.1 ± 0.9                                             | 1.0 ± 0.4                                                | .416  |
| eGFR (mL/min/1.73m <sup>2</sup> )       | 73.2 ± 26.9              | 67.4 ± 22.7                                           | 76.0 ± 28.6                                              | .349  |
| AST (UI/L)                              | 31.4 ± 15.7              | 27.9 ± 18.1                                           | 33.1 ± 14.5                                              | .328  |
| ALT (UI/L)                              | 24.2 ± 14.0              | 22.2 ± 19.4                                           | 25.2 ± 10.5                                              | .547  |
| ALP (UI/L)                              | 107 ± 38.6               | 111.1 ± 50.6                                          | 104.6 ± 32.0                                             | .732  |
| GGT (UI/L)                              | 150.1 ± 162.5            | 205.3 ± 243.3                                         | 117.9 ± 88.6                                             | .270  |

|                                             |               |               |               |      |
|---------------------------------------------|---------------|---------------|---------------|------|
| Bilirubin (mg/dL)                           | 1.1 ± 0.5     | 1.0 ± 0.3     | 1.1 ± 0.6     | .604 |
| Protein (g/dL)                              | 7.3 ± 0.7     | 7.1 ± 0.6     | 7.3 ± 0.7     | .399 |
| Albumin (g/dL)                              | 3.9 ± 0.4     | 3.9 ± 0.5     | 3.9 ± 0.4     | .877 |
| Renin (ng/mL/h)                             | 8.5 ± 10.9    | 16.6 ± 12.4   | 2 ± 1.9       | .033 |
| Aldosterone (ng/dL)                         | 24.5 ± 17.2   | 27.9 ± 19.8   | 21.8 ± 16.1   | .589 |
| BNP (pg/mL)                                 | 331.0 ± 263.5 | 336.5 ± 331.0 | 324.1 ± 197.1 | .949 |
| <b>Right catheterization</b>                |               |               |               |      |
| sPAP (mmHg)                                 | 43 ± 14.3     | 45.6 ± 18.2   | 41 ± 10.8     | .457 |
| mPAP (mmHg)                                 | 29.0 ± 8.1    | 29.9 ± 9.1    | 28.4 ± 7.5    | .665 |
| dPAP (mmHg)                                 | 20.4 ± 5.8    | 19.8 ± 5.9    | 20.8 ± 5.8    | .698 |
| iPVR (dyn*m <sup>2</sup> /cm <sup>5</sup> ) | 396.8 ± 163.0 | 412.7 ± 169.6 | 387.3 ± 167.5 | .774 |
| RA pressure (mmHg)                          | 14.19 ± 1.48  | 16.89 ± 5.33  | 12.17 ± 7.26  | .117 |
| <b>Echocardiography</b>                     |               |               |               |      |
| LVEF (%)                                    | 56.7 ± 7.1    | 56.9 ± 5.7    | 56.5 ± 7.8    | .869 |
| TAPSE (mm)                                  | 16.9 ± 3.6    | 17.1 ± 3.3    | 16.7 ± 3.9    | .789 |
| S' Tricuspid annulus (cm/s)                 | 8.9 ± 1.9     | 8.9 ± 1.7     | 8.9 ± 2.0     | .966 |
| sPAP (mmHg)                                 | 53.3 ± 12.4   | 56.5 ± 17.3   | 52.2 ± 10.6   | .406 |
| Right atrium area (cm <sup>2</sup> )        | 35.5 ± 9.8    | 33.4 ± 9.9    | 36.6 ± 9.9    | .455 |
| Tricuspid annulus diameter (mm)             | 42.7 ± 7.5    | 42.6 ± 5.4    | 42.7 ± 8.6    | .972 |
| Inferior cava vein diameter (mm)            | 22.9 ± 5.4    | 22.8 ± 5.3    | 23 ± 5.5      | .902 |
| Massive tricuspid regurgitation             | 34 (85.0)     | 12 (92.3)     | 22 (81.5)     | .762 |
| <b>Magnetic resonance</b>                   |               |               |               |      |
| iRVEDV (mL)                                 | 101.4 ± 36.0  | 119.5 ± 38.0  | 92.6 ± 32.2   | .025 |
| iRVESV (mL)                                 | 50.4 ± 18.9   | 53.8 ± 16.6   | 48.8 ± 20.1   | .446 |
| RVEF (%)                                    | 49.1 ± 8.5    | 54 ± 6.0      | 46.7 ± 8.6    | .009 |
| iLVEDV (mL)                                 | 81.4 ± 28.3   | 77.3 ± 21.9   | 83.4 ± 31.1   | .543 |
| iLVESV (mL)                                 | 39.8 ± 20.6   | 35.3 ± 14.5   | 42 ± 23.0     | .365 |
| LVEF (%)                                    | 52.4 ± 8.7    | 54 ± 10.6     | 51.7 ± 7.8    | .455 |
| Right atrium area (cm <sup>2</sup> )        | 35.9 ± 10.4   | 34.2 ± 8.4    | 36.7 ± 11.3   | .486 |
| Tricuspid annulus diameter (mm)             | 43.8 ± 7.4    | 42.3 ± 5.6    | 44.4 ± 8.2    | .401 |
| Longitudinal strain (%)                     | -16.7 ± 6.1   | -20.4 ± 3.3   | -14.0 ± 6.3   | .002 |
| Circumferential strain (%)                  | -14.7 ± 3.7   | -17.0 ± 2.3   | -13.6 ± 3.7   | .009 |
| Radial strain (%)                           | 24.3 ± 7.6    | 28.5 ± 5.2    | 22.3 ± 7.9    | .025 |
| Right atrium volume (mL)                    | 217.4 ± 114.9 | 183.3 ± 79.0  | 244.1 ± 133.4 | .194 |
| Right atrium diameter AP (mm)               | 88.4 ± 91.1   | 73 ± 9.4      | 95.7 ± 110.6  | .467 |
| Right atrium diameter LM (mm)               | 60.4 ± 13.3   | 58.5 ± 15.5   | 61.3 ± 12.3   | .529 |
| <b>Treatment at discharge</b>               |               |               |               |      |

|                   |             |           |             |      |
|-------------------|-------------|-----------|-------------|------|
| Betablocker       | 9 (23.7%)   | 4 (33.3%) | 5 (19.2%)   | .423 |
| ACEi/ARB          | 19 (50%)    | 7 (58.3%) | 12 (46.2%)  | .485 |
| MRA               | 16 (42.1%)  | 7 (58.3%) | 9 (34.6%)   | .169 |
| Furosemide        | 35 (92.1%)  | 12 (100%) | 23 (88.5%)  | .220 |
| Furosemide dosage | 65.1 ± 44.3 | 65 ± 58.5 | 65.2 ± 36.3 | .231 |

BMI, body mass index; CAD, coronary artery disease; COPD, chronic obstructive pulmonary disease; eGFR, glomerular filtration rate; AST, aspartate aminotransferase ; ALT, alanine aminotransferase; ALP, alkaline phosphatase; GGT, gamma-glutamyltransferase; BNP, brain natriuretic peptide; sPAP, systolic pulmonary artery pressure; mPAP, mean pulmonary artery pressure; dPAP, diastolic pulmonary artery pressure; iPVR, indexed pulmonary vascular resistance; LVEF, left ventricular ejection fraction; iRVEDV, indexed right ventricular end-diastolic volume; iRVESV, indexed right ventricular end-systolic volume; RVEF, right ventricular ejection fraction; iLVEDV, indexed left ventricular end-diastolic volume; iLVESV, indexed left ventricular end-systolic volume; AP, anteroposterior; LM, lateral-medial.

Values are mean ± standard deviation or n (%).



Figure 1 of the supplementary data

Martingale residuals distribution for primary end-point

Fig 1A

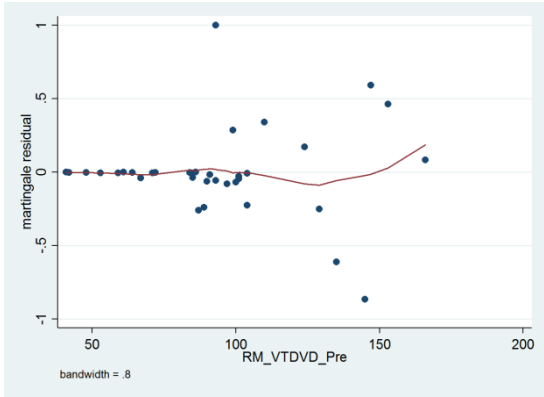

Fig 1B

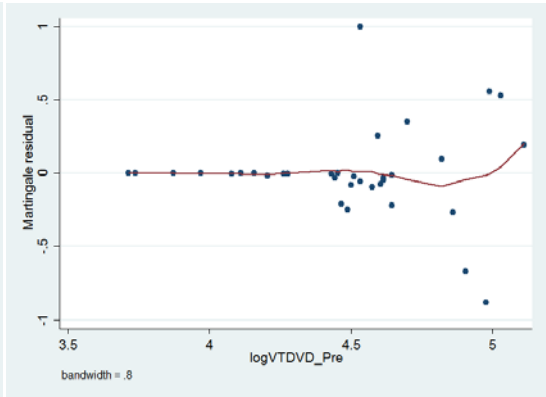

Figure 2 of the supplementary data

Martingale residuals distribution for cardiovascular mortality

Fig 2A

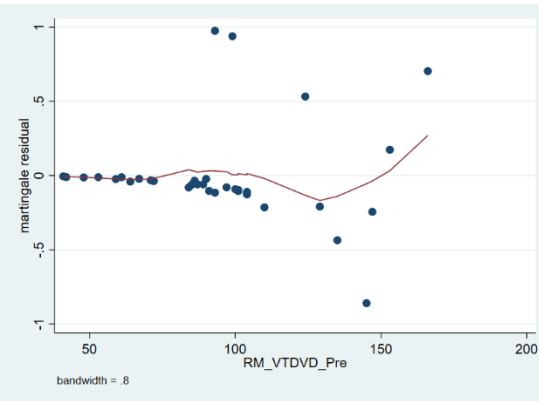

Fig 2B

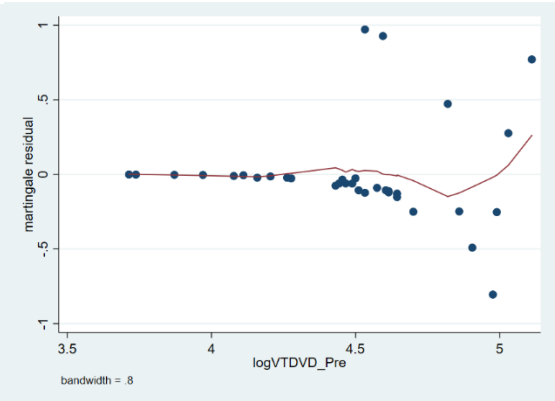

Supplement: mmc1 [file S1885585720304096:mmc1.pdf]
